# Supplementary material for: OsNPR1 Enhances Rice Resistance to Xanthomonas oryzae pv. oryzae by Upregulating Rice Defense Genes and Repressing Bacteria Virulence Genes
Source: MDPI journal article supplement (doi:10.3390/ijms24108687), 2023-05-12
Supplement: s1 [file s1]

Table S4. List of the primer pairs of qPCR genes

| Rice gene          | primer-F                 | primer-R                 |
|--------------------|--------------------------|--------------------------|
| <i>OsNPR1</i>      | TGAGAGTCTACGAGGAAGGTTGC  | CGTTGTCTTTCAGGAGGTGGAT   |
| <i>OsGH3.8</i>     | CCGGTCATGAACTTGTATGTGC   | CGTGTAAGTTGTGGTACGGGT    |
| <i>OsPR10a</i>     | CGCCGCAAGTCATGTCCTAA     | CTTCGTCTCCGTCGAGTGTG     |
| <i>OsWRKY45</i>    | ATTCGGTGGTCGTCAAGAACC    | CACCGGAAGTAGGCCTTTG      |
| <i>OsWRKY51</i>    | CATCGGGTGAAGAGGACGAT     | TAGTATCCTCGTGGGAAGGGG    |
| <i>OsWRKY76</i>    | AGCTGCCCCGAATTCTAGCTT    | GCCCAAGGACCAACAGGTTA     |
| <i>OsPR1a</i>      | TATGCTATGCTACGTGTTTATGC  | CACTAAGCAAATACGGCTGACA   |
| <i>OsPR1b</i>      | ATTGCTTTGGCCATGGTAGC     | CGTTGTGGAGCCTCACGTA      |
| <i>OsPR5</i>       | GCAACAGCAACTACCAAGTCG    | ATGATTATCGATCAAGGTGTCGT  |
| <i>OsActin</i>     | TCCGTAAGTACGTGGGGAGT     | GCAGACTAGCAGTTGCGGTA     |
| PXO99A gene        | primer-F                 | primer-R                 |
| <i>PXO_RS00410</i> | ATCAGCCGATCTTTATAACCTCT  | TTTGGCCTTCATTGACGAAA     |
| <i>PXO_RS00385</i> | AACACGCGGATCGACAAT       | ATAATTCCGACCATCCTGACC    |
| <i>PXO_RS00405</i> | GAATCGTTCGTTATCCAGCAATA  | GATTGGCTGACTCAAGTTCGAC   |
| <i>PXO_RS00325</i> | TCACTCAGGATATGAGCAAGATTC | GTCATGCAGGACGTTGAAGT     |
| <i>PXO_RS17595</i> | AGCTGATCACCATCAACATGAG   | AACACTTGGAAGAACATCTCCAG  |
| <i>PXO_RS00580</i> | CCTTTTCCGATTCGCATTT      | CAGGTCGTACATATAGGTGGTGAA |
| <i>16S rRNA</i>    | ATGAAGTCGGAATCGCTAGTAATC | GATACGGCTACCTTGTTACGACTT |
